# Supplementary material for: Immune response of heterologous versus homologous prime-boost regimens with adenoviral vectored and mRNA COVID-19 vaccines in immunocompromised patients
Source: PubMed Central journal article supplement (PMC10291065; doi:10.3389/fimmu.2023.1187880), 2023-06-12
Supplement: Image_1.pdf [file Image_1.pdf]

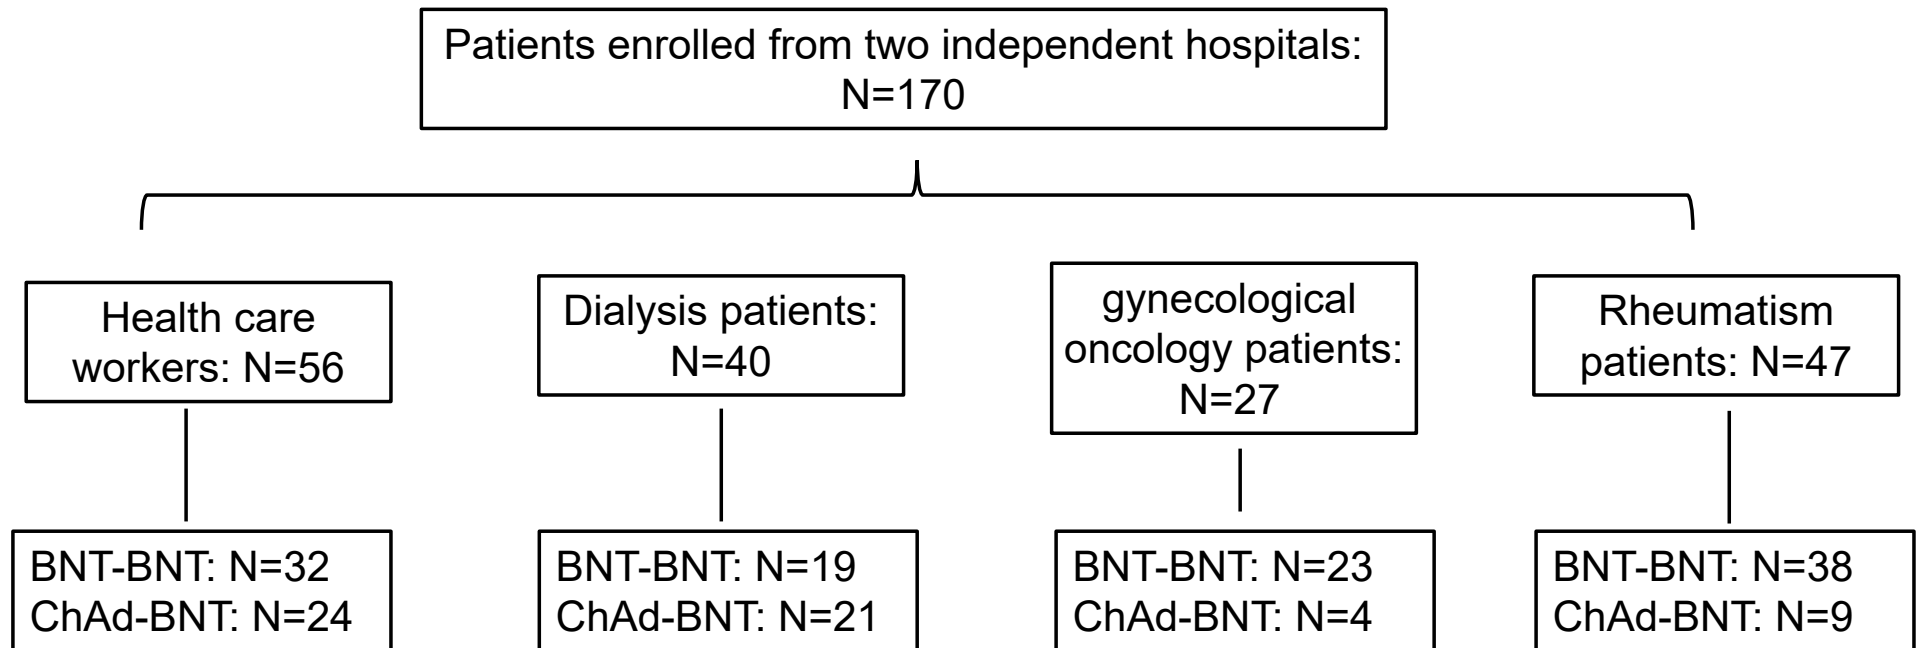

**Supplementary Figure 1.** This cohort consists of 170 participants from two independent hospitals, including 56 healthcare workers as healthy controls, of which 32 participants received the homologous regimen (BNT-BNT); 40 dialysis patients, of which 19 participants received the homologous regimen (BNT-BNT); 27 gynecological oncology patients, of which 23 participants received the homologous regimen (BNT-BNT), and 47 rheumatic patients, of which 38 participants received the homologous regimen (BNT-BNT).
